# Supplementary material for: Identification and analysis of the expansin gene family in yam
Source: PeerJ. 2025 Sep 30;13:e20093. doi: 10.7717/peerj.20093 (PMC12493719; doi:10.7717/peerj.20093)
Supplement: Supplemental Information 8 [file peerj-13-20093-s008.xlsx]

## Sheet: Sheet2
The Cq values for qPCR of DoEXP genes
	DoActin	DoEXPA9	DoActin	DoEXPA16	DoActin	DoEXPA18	DoActin	DoEXPA19	DoActin	DoEXPA20	DoActin	DoEXPB2	DoActin	DoEXLA1	DoActin	DoEXLB1	DoActin	DoEXLB2
NH_F	17.29	31.8	17.72	30.37	17.72	23.17	17.72	24.52	17.29	30.02	18.15	27.83	17.72	19.55	18.15	24.39	18.15	22.28
	17.65	30.84	17.57	29.9	17.57	23.06	17.57	24.6	17.65	29.64	17.92	28.12	17.57	19.45	17.92	24.25	17.92	22.23
	17.79	31.09	17.75	29.95	17.75	23.1	17.75	24.6	17.79	29.11	17.76	27.95	17.75	19.57	17.76	24.48	17.76	22.27
NH_E	17.8	28.37	16.84	28.81	16.84	21.26	16.84	23.43	17.8	28.06	17.41	23.46	16.84	20.3	17.41	25.63	17.41	23.6
	18.17	28.24	17.07	28.6	17.07	21.3	17.07	23.95	18.17	28.75	17.53	23.36	17.07	20.01	17.53	25.62	17.53	23.94
	18.02	27.95	17.09	28.84	17.09	21.38	17.09	23.95	18.02	28.42	17.42	23.16	17.09	20.07	17.42	25.33	17.42	23.88
NH_M	16.62	32.59	16.16	31.61	16.16	23.26	16.16	24.04	16.62	35.51	17.12	26.72	16.16	21.86	17.12	26	17.12	25.85
	16.49	32.23	16.47	30.76	16.47	23.14	16.47	24.09	16.49	34.11	16.91	26.5	16.47	22.08	16.91	25.91	16.91	24.84
	16.33	33.02	16.49	31.32	16.49	23.37	16.49	24.2	16.33	36.64	17.31	26.72	16.49	22.08	17.31	26.12	17.31	25.22
NH_L	17.01	33.36	18.02	31.79	18.02	24.18	18.02	23.55	17.01	27.9	17.91	28.55	18.02	22.36	17.91	28.22	17.91	26.36
	17.07	31.84	17.75	31.59	17.75	24.21	17.75	24.14	17.07	27.95	17.52	28.33	17.75	22.86	17.52	28.09	17.52	26.4
	17.14	32.06	17.77	31.83	17.77	23.86	17.77	24.07	17.14	28.28	18.04	29.06	17.77	22.84	18.04	27.72	18.04	26.64
